# Supplementary figures and images for: Up-regulation of myelin-associated glycoprotein is associated with the ameliorating effect of omega-3 polyunsaturated fatty acids on Alzheimer's disease progression in APP–PS1 transgenic mice
Source: Royal Society of Chemistry journal article supplement (doi:10.1039/d4fo03355h), 2024-01-01

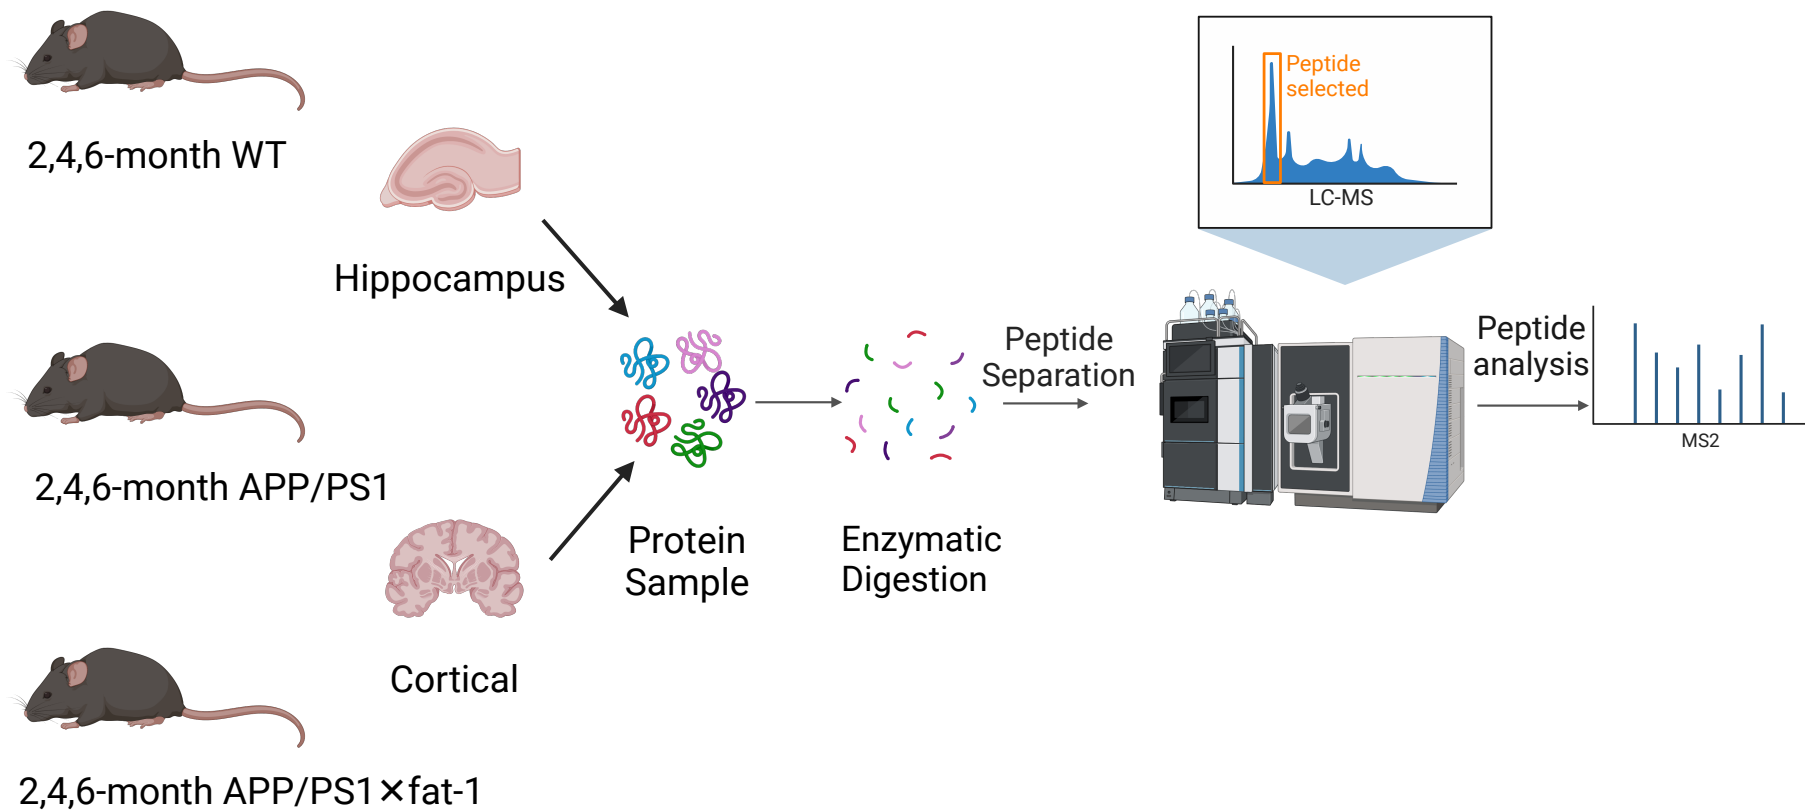

Supplement: d4fo03355h2.pdf [file d4fo03355h2.pdf]
